# Supplementary material
Source: PubMed Central journal article supplement (PMC3536274)
Supplement: EC.00203-12_zek999094012so1.pdf [file EC.00203-12_zek999094012so1.pdf]

## Supplementary Figure S1

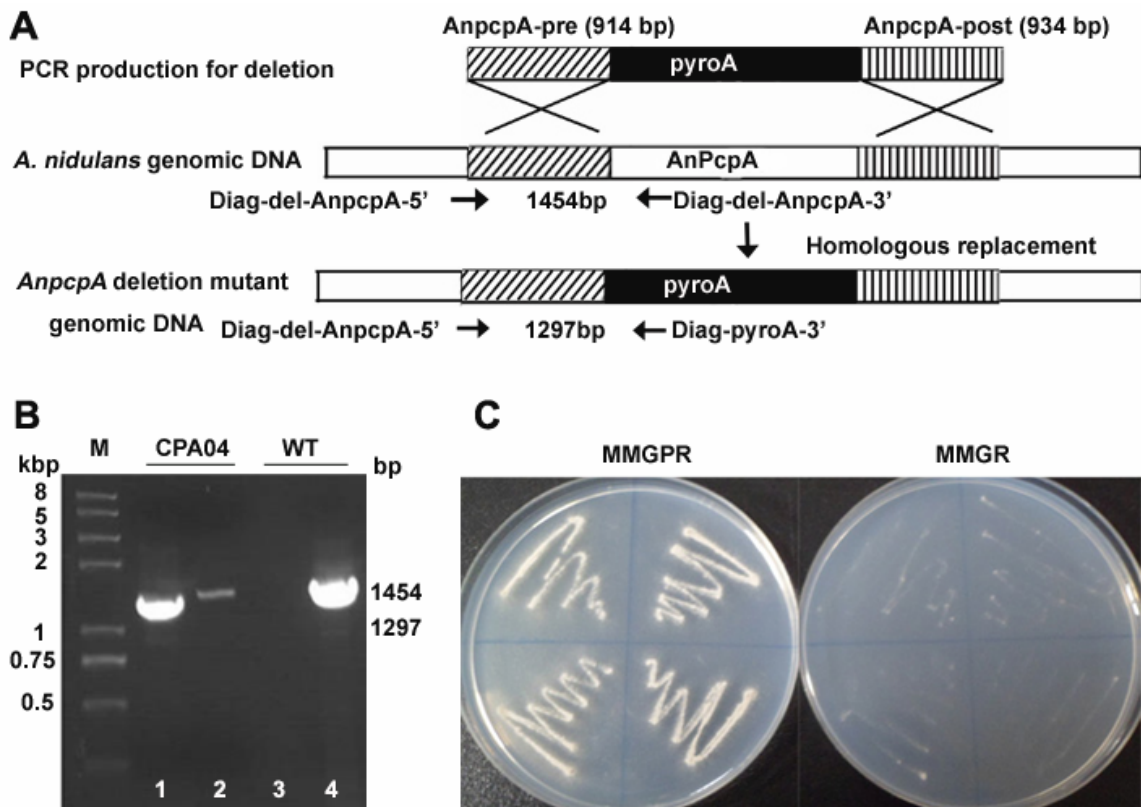

Fig S1 *AnpcpA* gene was deleted by homologues integration in the background of the SJW100 (GFP-MTs) strain. (A) Diagram showing the deletion strategy for *AnpcpA*. (B) PCR analysis showing the inegration of *AnpyroA* nutritional marker into the genome at the original *AnpcpA* locus in the CPA04 strain while *AnpcpA* gene still can be detected, suggesting transformants belonged to the heterokaryons. For lanes 2 and 4, primers were Diag-del-AnpcpA-5' and Diag-del-AnpcpA-3' to detect whether *AnpcpA* still exists in the genome, the expected size is 1454 bp. For lanes 1 and 3, primers were Diag-del-AnpcpA-5' and Diag-pyroA-3' to detect whether there was a homologous recombination to replace *AnpcpA* with nutritional marker gene *pyroA* in the genome, the expected size is 1297 bp. In lanes of 3 and 4, genomic DNA of TN02A7 was used for PCR template, 1 and 2 were using genomic DNA of transformants as PCR templates. (C) Replica transformant spores onto

MMGPR and MMGR. When the transformant spores were inoculated onto non-selective MMGPR media, they germinated and formed into colonies. However, the same mixed spores from the transformants streaked on selective MMGR media were unable to form colonies.

### Supplementary Figure S2

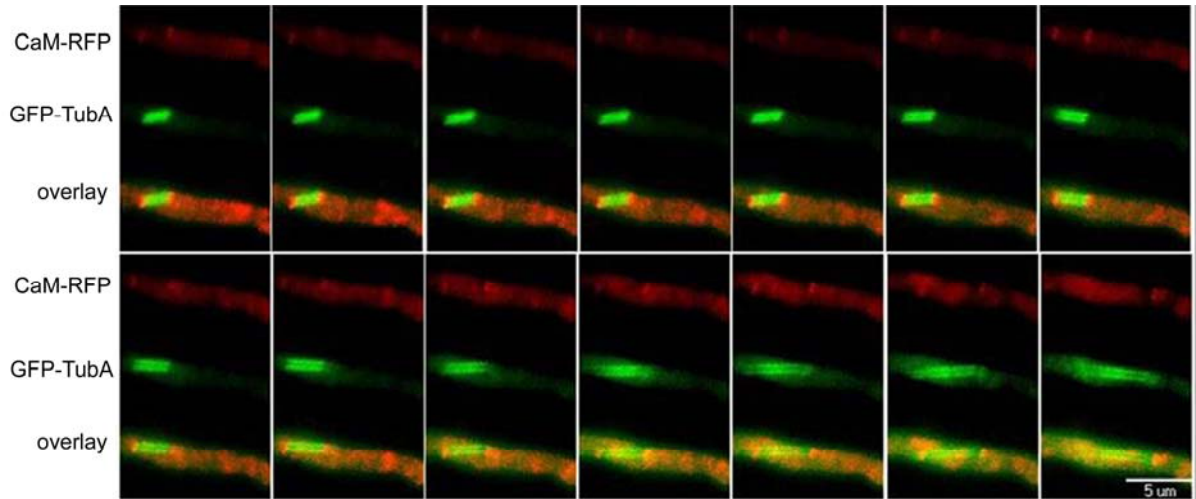

Fig S2 Localization relationship between GFP-tubA and CaM-RFP in SCA02 (generated from crossing CSA02 with SJW100 ). Time duration: 4 min, time interval: 5s. Bar: 5 μm.

### Supplementary Figure S3

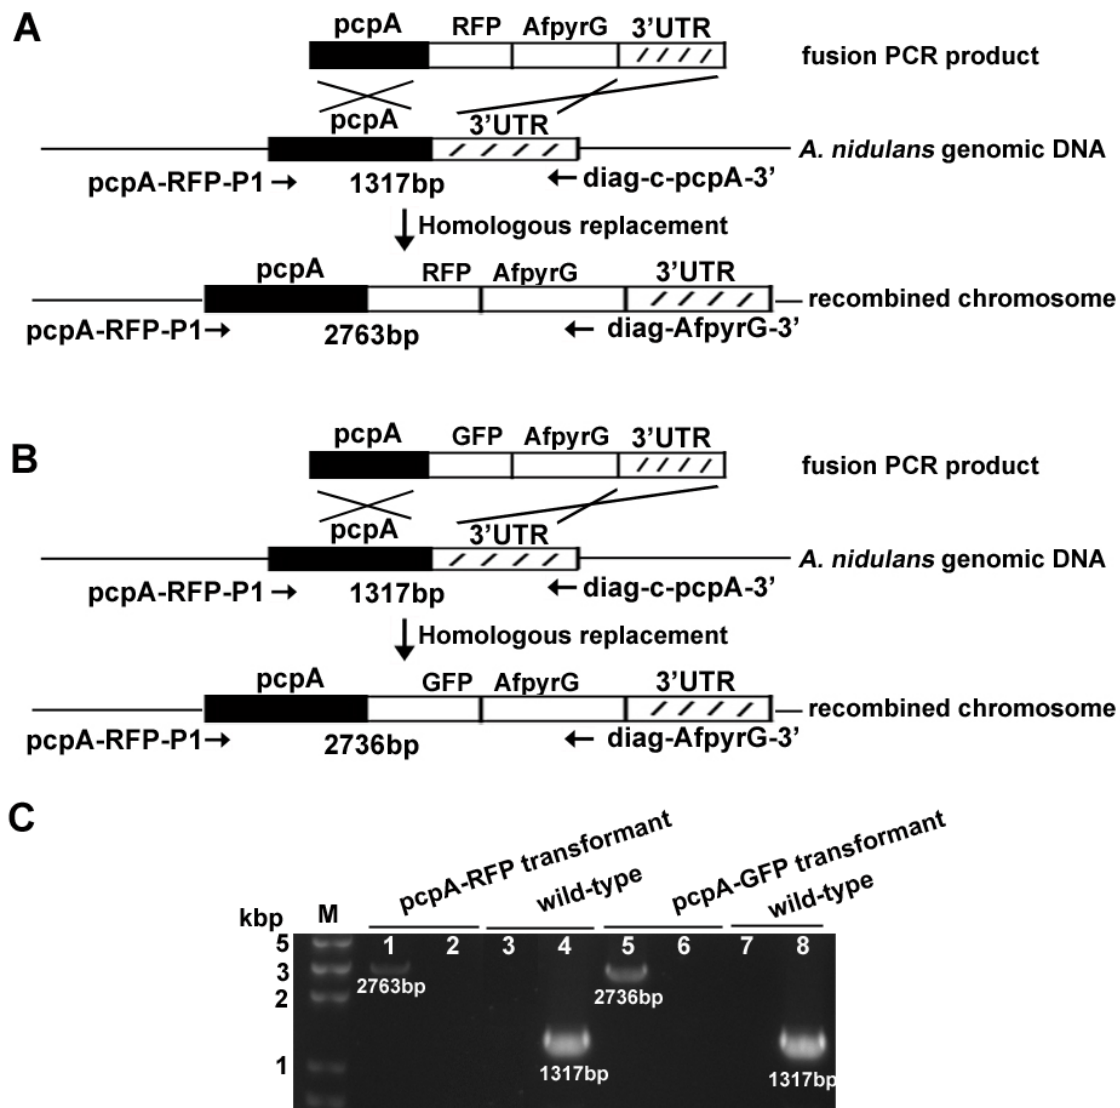

Fig S3 *pcpA* gene tagging strategy and identification. (A, B)Diagram showing the *pcpA* gene tagging strategy at C-terminal by highly efficient gene homologous integration strategy. (C) PCR analysis showing a cassette encoding the RFP or GFP and AfpyrG into the 3' end of the *pcpA* gene by highly efficient gene homologous integration strategy. In lanes of 3, 4, 7 and 8, genomic DNA of TN02A7 was used for PCR template, 1, 2, 5 and 6 were using genomic DNA of transformants as PCR templates.

### Supplementary movie 1

Movie 1 Shape remodeling of cell from CPA02 after shifted from MMGPR to YAG for 4 h with the decreasing of GFP-AnPcpA expression.

Supplementary Figure S4

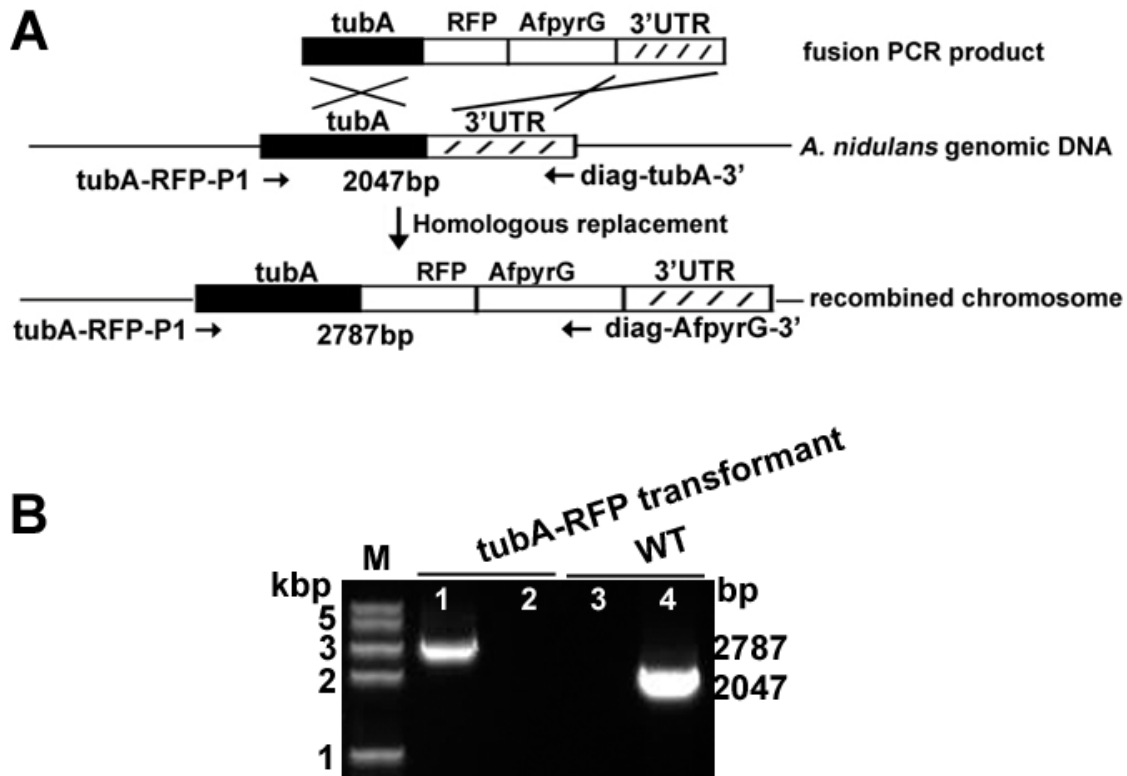

Fig S4 *tubA* gene tagging strategy and identification. (A) Diagram showing the *tubA* gene tagging strategy at C-terminal by highly efficient gene homologous integration strategy. (C) PCR analysis showing a cassette encoding the RFP and AfpyrG into the C-terminal of the *tubA* gene by highly efficient gene homologous integration strategy. In lanes of 3 and 4, genomic DNA of CPA02 was used for PCR template, 1 and 2 were using genomic DNA of transformants as PCR templates.

**Supplementary Table S1.** Primers used in this study

| Primer name | DNA sequence 5'-3'                   |
|-------------|--------------------------------------|
| AnpcpA-5'   | ATAAGAATGCGGCGGCAGATGGCCTACCCGTACATC |
| AnpcpA -3'  | GCTCTAGAATCCTCGATATCGTCACGGAG        |
| Diag-GFP-5' | GACACCCTCGTCAACAGGATCG               |

---

|                    |                                            |
|--------------------|--------------------------------------------|
| PyrG-5'            | GCTCGAGCATGCATCTAGAG                       |
| PyrG-3'            | CTGTCTGAGA GGAGGCACTG                      |
| Diag-AnpcpA -3'    | GTTCAATTTGTTGGAGTTTTAGACT                  |
| Diag-AnpcpA -5'    | GCACGCTGGAGACTTTTTGGACT                    |
| Diag-del-AnpcpA-5' | GCTTTTCGTTCTTCGGCTTTA                      |
| AnpcpA-pre-3'      | CTCTAGATGCATGCTCGAGCCTTCGGAGGGAAAACGCGT    |
| AnpcpA-post-5'     | CAGTGCCTCCTCTCAGACAGAACACCTGCTGGAAGTCGG    |
| AnpcpA-post-3'     | GAAGATGTTTCATGCTAGCTGTTGGC                 |
| Full5'             | TAAATATCATACTGAGAACCTACT                   |
| Full3'             | CGGTCACTGGCAGAGCAGAGCGAAG                  |
| Diag-AfpyrG-3'     | TAGGGACCGAGACCTGTATC                       |
| Diag-del-AnpcpA-3' | CTTCATCAATCCCTGTCATTTCCAT                  |
| PyroA-5'           | TTGGCGGGTAAGTCAGATAATAG                    |
| PyroA-3'           | CTGACTTGACGCTTTCTCTTGG                     |
| P3-SJW100-de       | CTATTATCTGACTTACCCGCCAACTTCGGAGGGAAAACGCGT |
| P4-SJW100-de       | AAGAGAAAGCGTCAAGTCAGAACACCTGCTGGAAGTCGG    |
| Diag-pyroA-3'      | TTGACAACATCCATAATAACACCGC                  |
| RFP 5'             | GGAGCTGGTGCAGGCGCTG                        |
| RFP 3'             | CTGTCTGAGAGGAGGCACTGATG                    |
| pcpA-RFP-P1        | ATCGGGAACCTCGCACTCACC                      |
| diag-c-pcpA-3'     | GTAAGCACCCATGAGCTCTCCTG                    |
| pcpA-RFP-P2        | CAGCCGCCAGCAAATCAGGAG                      |

---

---

|               |                                            |
|---------------|--------------------------------------------|
| pcpA-RFP-P5   | TCCAACCCTATCAGCTCAGAAC                     |
| pcpA-RFP-P3   | CAGCGCCTGCACCAGCTCCCTCCTTCGATA ACTCCCTTC   |
| pcpA-RFP-P4   | CAGTGCCTCCTCTCAGACAGCATAGACTGAGAAATTTGAAAC |
| pcpA-RFP-P6   | GTCACTGGCAGAGCAGAGCGAAG                    |
| pcpA-GFP-P2   | TCGAGAGACGTATCCATGAGCTG                    |
| pcpA-GFP-P5   | GTCACTGGCAGAGCAGAGCGAAG                    |
| TubA-RFPuu-P1 | AGGATGCCTCAAACAACACTACGCTC                 |
| TubA-RFPuu-P2 | GGAGATGATTGACCAGGTTCTTGAC                  |
| TubA-RFPuu-P3 | TCCAGCGCCTGCACCAGCTCCGTACTCAACTTCCTCACCTC  |
| TubA-RFPuu-P4 | CAGTGCCTCCTCTCAGACAGTCTATTGGGAGCCAGGGTAG   |
| TubA-RFPuu-P5 | CGACATAACCAATCCGAGGGTTTCC                  |
| TubA-RFPuu-P6 | CGCACTTTACGATGCTGGGATTTC                   |

---
